# Supplementary material for: ABA signalling promotes cell totipotency in the shoot apex of germinating embryos
Source: J Exp Bot. 2021 Jun 27;72(18):6418–36. doi: 10.1093/jxb/erab306 (PMC8483786; doi:10.1093/jxb/erab306)
Supplement: erab306_suppl_Supplementary_Materials [file erab306_suppl_supplementary_materials.pdf]

## SUPPLEMENTARY DATA

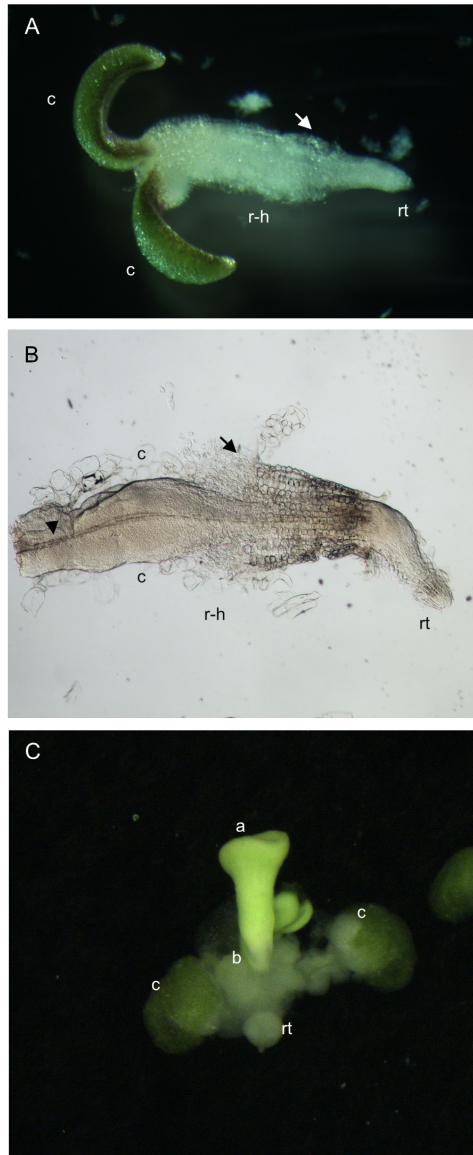

**Supplementary Fig. S1.** Development of the root hypocotyl region in 2,4-D-treated explants. **A**, Four-day-old WT Col-0 explant from somatic embryo culture. c, cotyledon; r-h, root-hypocotyl region; rt, root tip. Arrow, the loose outer layer of the root-hypocotyl region. **B**, Close up of the root-hypocotyl region of an eight-day-old WT Col-0 explant. **C**, callus; r-h, root-hypocotyl region; rt, root tip. Arrowhead, vascular tissue cylinder, arrow, detached epidermal/subepidermal cells. **C**, Embryogenic explant (14 d), with a bipolar embryo. c, cotyledon; rt, root tip; a and b indicate the apical pole (the future shoot) and basal pole (the future root), respectively. The images are light micrographs.

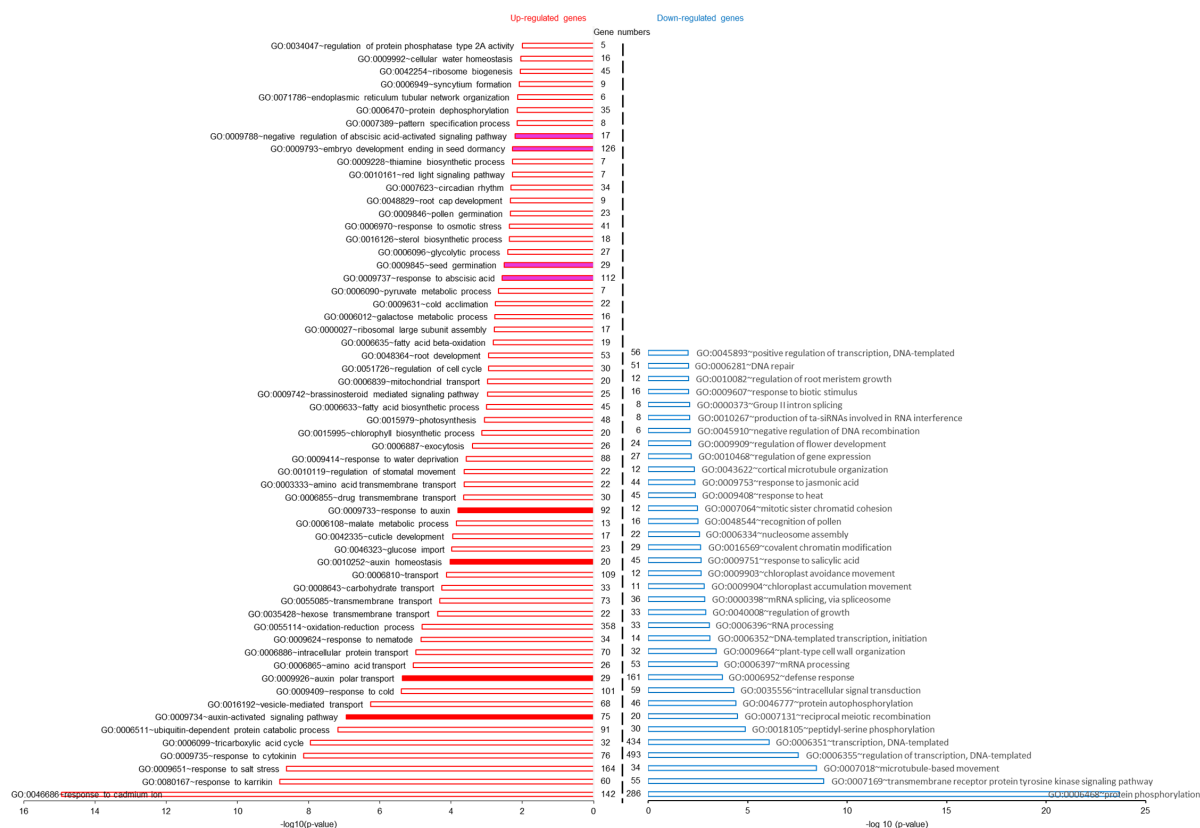

**Supplementary Fig. S2.** GO analysis of 2,4-D differentially-regulated genes. GO analysis of 2,4-D significantly differentially-regulated genes (log2 fold change > 0.5 or < -0.5) responsive to 2,4-D treatment. The top GO terms (with  $p$ -values < 0.01) are shown here with the  $p$ -value at the end of each bar. The GO analysis was performed using DAVID (<https://david.ncicrf.gov/summary.jsp>) with EASE 0.05 (a cut-off value of  $p$  < 0.05).

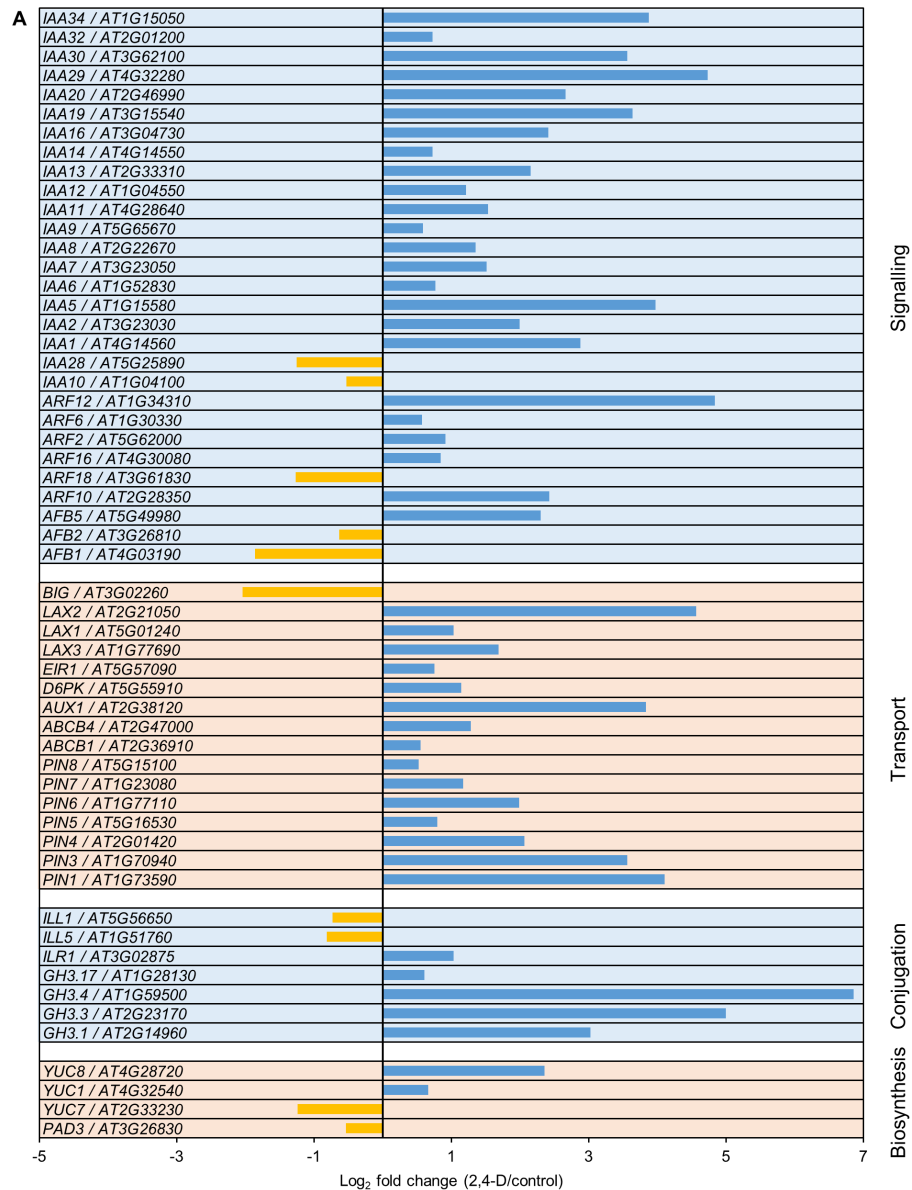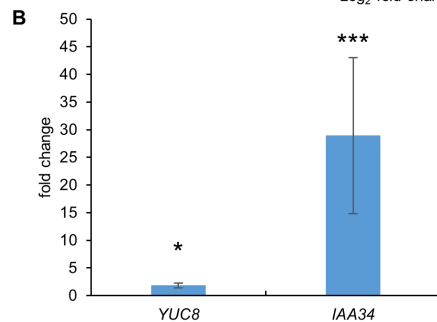

**Supplementary Fig. S3.** Statistically significant differentially-regulated auxin pathway genes. **A**, A selection of genes whose expression was altered in germinating seeds in response to 2,4-D treatment is shown. The gene name and arabidopsis gene identifier (AGI), as well as the log<sub>2</sub> fold change in expression between 2,4-D-treated seeds and control seeds are shown for each gene. Genes were grouped per functional category. The complete data set can be found in Supplemental Data Set 1. **B**, qRT-PCR validation of differentially-expressed auxin-related genes. Relative expression ( $2^{-\Delta\Delta C_T}$ ) was determined by qRT-PCR in two-day-old explants cultured in the presence or absence (calibrator) of 2,4-D. Statistically significant differences between 2,4-D treatment and the control were calculated using a two-tailed Student's t-test (\*,  $p < 0.05$ ; \*\*\*,  $p < 0.001$ ). Error bars represent the standard deviation of three biological replicates.

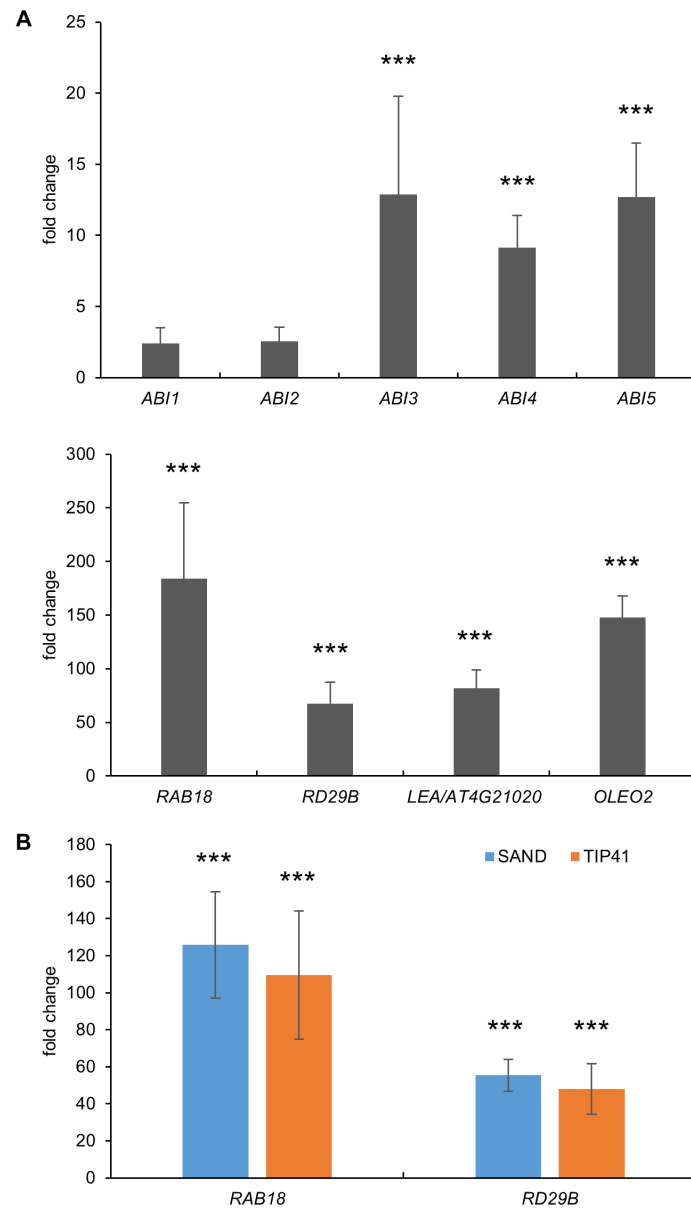

**Supplementary Fig. S4.** qRT-PCR validation of differentially-expressed ABA-related genes in SE culture. **A**, Relative expression ( $2^{-\Delta\Delta C_t}$ ) was determined in two-day-old explants that were cultured in the presence or absence (calibrator) of 2,4-D. *SAND* was used as the reference gene. **B**, Validation of the qRT-qPCR results in (A) for *RAB18* in the higher expression range and *RD29B* in the lower expression range using two reference genes (*SAND* and *TIP41*). Statistically significant differences between 2,4-D treatment and the control were calculated using a two-tailed Student's t-test (\*\*\*,  $p < 0.001$ ). Error bars represent the standard deviation of three biological replicates.

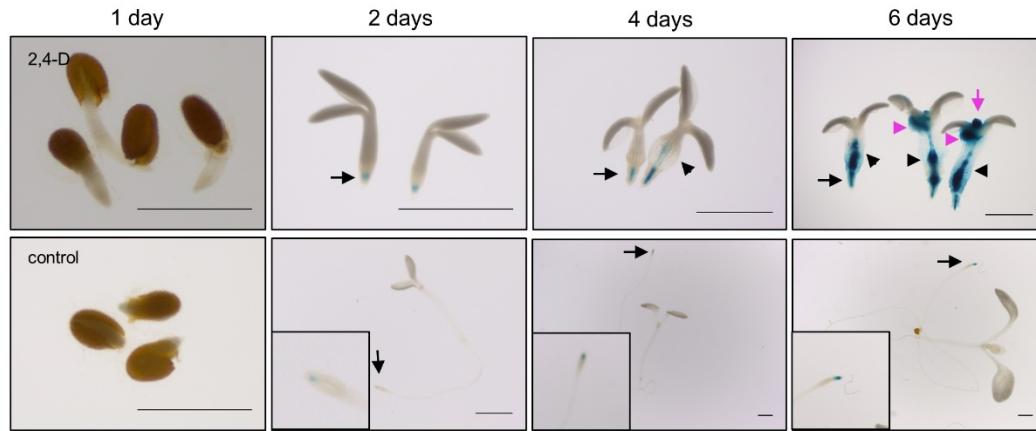

**Supplementary Fig. S5.** 2,4-D treatment induces ectopic *BBM:BBM-GUS* expression post-germination. *BBM:BBM-GUS* expression in somatic embryo cultures in the presence or absence (control) of 2,4-D. The insets are magnifications of the seedling root tip. The days of culture are indicated above the panels. The images are light micrographs. Black arrow, root tip expression; black arrowhead, hypocotyl expression; pink arrow, SAM expression; pink arrowhead, expression from callus on the petiole. Scale bars, 1mm.

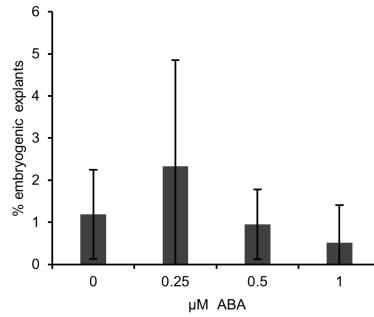

**Supplementary Fig. S6.** The effect of ABA application on SE in ABA receptor mutant explants. Effect of exogenous ABA application on 2,4-D-induced SE from the *pyl112458* ABA receptor mutant. The Col-0 control was previously reported by Wu *et al.* (2019). Statistically significant differences in SE efficiency between ABA and the mock treatment were calculated using a two-tailed Student's t-test. No statistically significant difference was found. Error bars represent the standard deviation of three technical replicates.

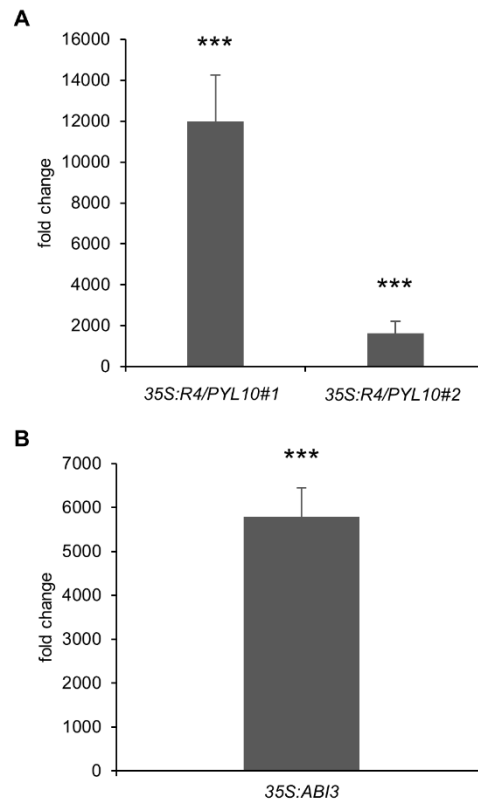

**Supplementary Fig. S7.** *35S:PYL10* and *35S:ABI3* overexpression lines. Elevated *PYL10* (A) and *ABI3* (B) gene expression was confirmed by qRT-PCR ( $2^{-\Delta\Delta C_T}$ ) by comparing seven-day-old *35S:PYL10* or *35S:ABI3* seedlings with seven-day-old WT Col-0 seedlings (calibrator). Statistically significant differences between overexpression lines and the control were calculated using a two-tailed Student's t-test (\*\*\*,  $p < 0.001$ ). Error bars represent the standard deviation of three technical replicates.

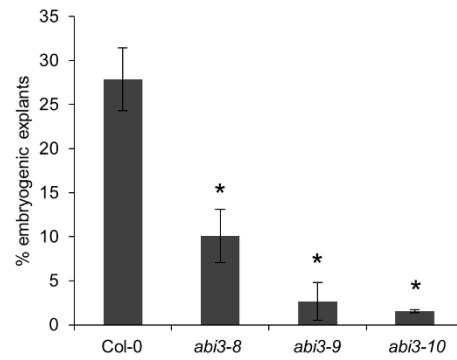

**Supplementary Fig. S8.** Effect of *abi3* weak alleles on 2,4-D-induced somatic embryogenesis. Statistically significant differences in SE efficiency between WT Col-0 and the indicated mutant explants were calculated using a two-tailed Student's t-test (\*,  $p < 0.05$ ). Error bars represent the standard deviation of three technical replicates.

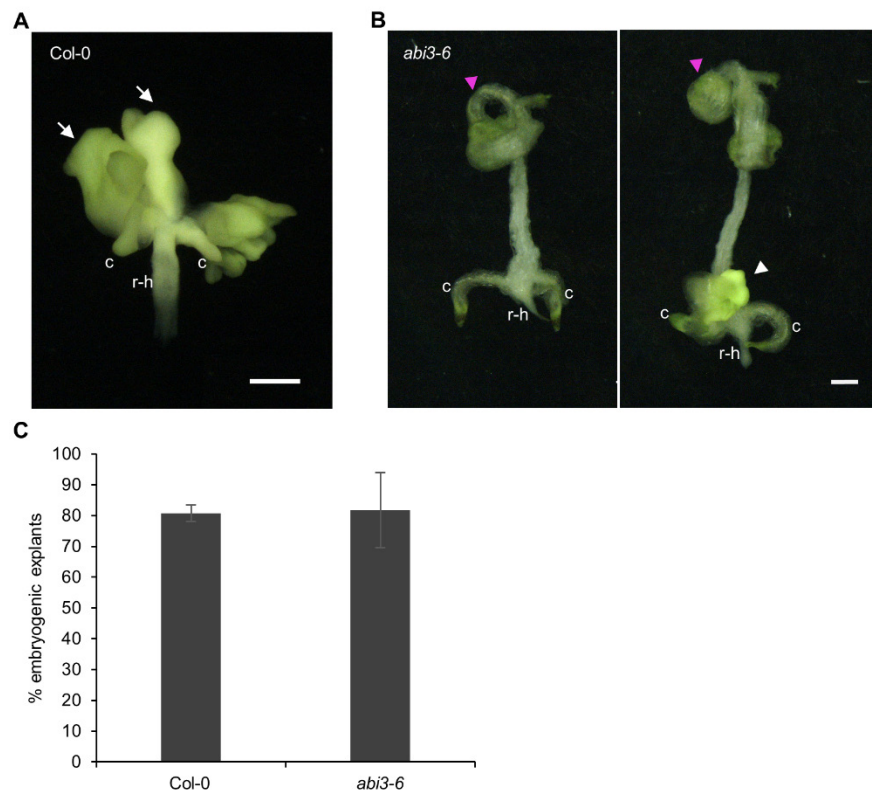

**Supplementary Fig. S9.** Effect of the *abi3-6* allele on 2,4-D-induced somatic embryogenesis from immature zygotic embryo explants. **A-B**, Representative embryogenic explants from WT Col-0 (**A**) and *abi3-6* (**B**) 14 days after the start of culture. The images are light micrographs. c, cotyledon; r-h, root hypocotyl region; white arrow, somatic embryo; pink arrowhead, shoot-like structure; white arrowhead, embryogenic tissues. Left panel, non-embryogenic explant; right panel, embryogenic explant. Scale bars, 1 mm. **C**, SE efficiency of WT and *abi3-6* immature zygotic embryo explants. No statistically significant differences in SE efficiency were observed between WT and *abi3-6* explants (two-tailed Student's t-test). Error bars represent the standard deviation of three technical replicates.

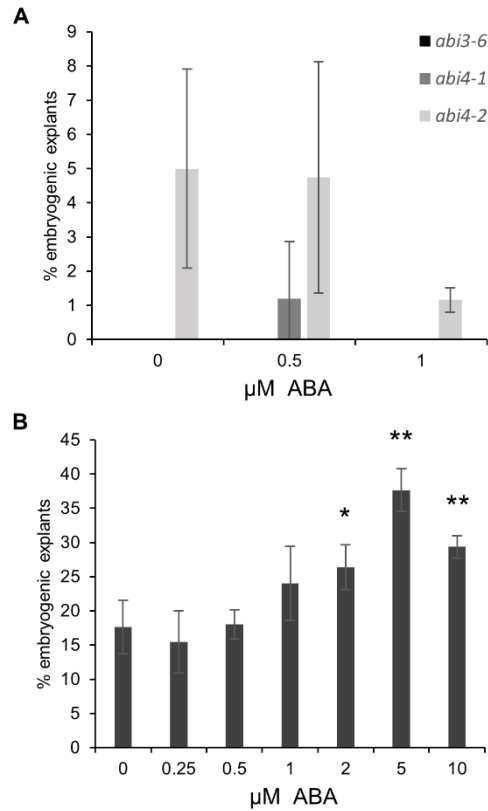

**Supplementary Fig. S10.** Effect of ABA application on SE efficiency in *abi3*, *abi4* and *abi5-7* explants. **A**, Effect of exogenous ABA application on 2,4-D induced SE from the *abi3-6*, *abi4-1* or *abi4-2* mutants. No statistically significant differences in SE efficiency were observed between treatments with and without ABA (two-tailed Student's t-test). Error bars represent the standard deviation of three technical replicates. **B**, Effect of exogenous ABA application on 2,4-D induced SE from the *abi5-7* mutant. Statistically significant differences in SE efficiency between ABA and mock treatments were calculated using a two-tailed Student's t-test (\* $p < 0.05$ ; \*\*,  $p < 0.01$ ). Error bars represent the standard deviation of three technical replicates.

**A *ABI3:GUS***

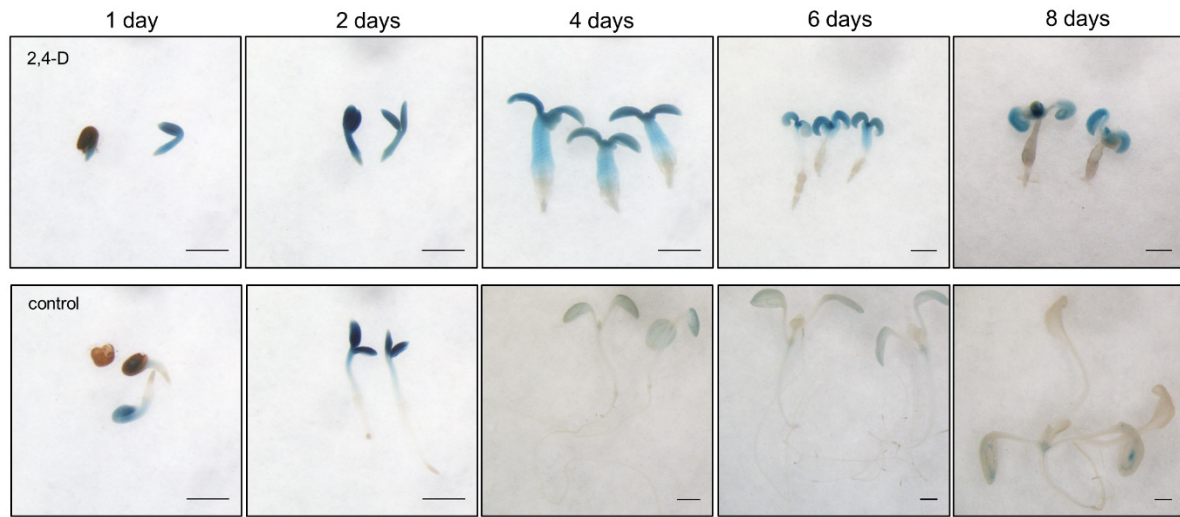

**B *ABI4:GUS***

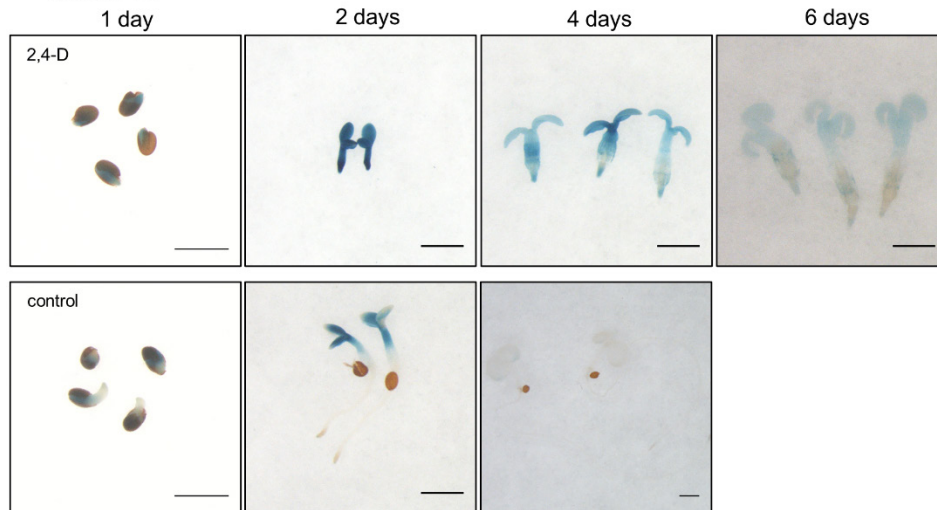

**Supplementary Fig. S11.** 2,4-D treatment maintains *ABI3* and *ABI4* expression post-germination. *ABI3:GUS* (A) and *ABI4:GUS* (B) expression in time after culture in the presence or absence (control) of 2,4-D. The days of culture are indicated above the panels. The images are light micrographs. Scale bars, 1mm.

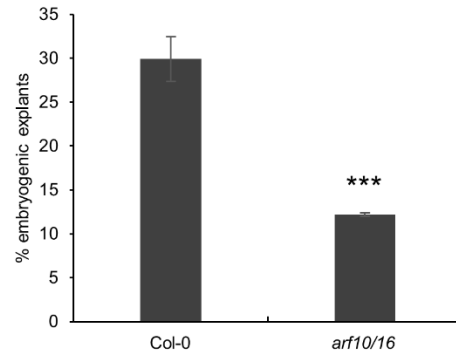

**Supplementary Fig. S12.** ARF10 and ARF16 are required for 2,4-D-induced SE. Effect of the *arf10/16* double mutant on 2,4-D-induced SE. Statistically significant differences in SE efficiency between WT Col-0 and mutant explants was calculated using a two-tailed Student's t-test (\*\*\*,  $p < 0.001$ ). Error bars represent the standard deviation of three technical replicates.

**Supplementary Table S1.** Plant materials.

| Arabidopsis lines                     | Source                                                        | Identifier   |
|---------------------------------------|---------------------------------------------------------------|--------------|
| <i>aba2-1</i>                         | Leon-Kloosterziel et al., 1996                                | N/A          |
| <i>cyp707a2-1</i>                     | Kushiro et al., 2004                                          | N/A          |
| <i>pyl10<sup>CR</sup></i>             | This study, 264 bp deletion<br>(after ATG, from +23 to + 286) | N/A          |
| <i>pyl8-1 pyl10<sup>CR</sup></i>      | This study                                                    | N/A          |
| <i>pyl8-1 pyl9</i>                    | Xing et al., 2016                                             | N/A          |
| <i>pyl8-1 pyl9 pyl10<sup>CR</sup></i> | This study                                                    | N/A          |
| <i>pyl112458</i>                      | Gonzalez-Guzman et al., 2012                                  | N/A          |
| <i>pyl112458379101112</i>             | Zhao et al., 2018                                             | N/A          |
| <i>hab1-1</i>                         | Saez et al., 2004                                             | Salk 002104C |
| <i>ahg3</i>                           | This study                                                    | Salk 009863C |
| <i>abi1-2 hab1-1</i>                  | Rubio et al., 2009                                            | N/A          |
| <i>Snrk2.2 snrk2.3 snrk2.6 triple</i> | Fujii and Zhu, 2009                                           | N/A          |
| <i>abi3-6</i>                         | Nambara et al., 1994                                          | N/A          |
| <i>abi3-8</i>                         | Nambara et al., 2002                                          | N/A          |
| <i>abi3-9</i>                         | Nambara et al., 2002                                          | N/A          |
| <i>abi3-10</i>                        | Nambara et al., 2002                                          | N/A          |
| <i>abi4-1</i>                         | Finkelstein et al., 1998                                      | N/A          |
| <i>abi4-2</i>                         | Quesada et al., 2000                                          | N/A          |
| <i>abi4-3</i>                         | Dijkwel et al., 1996, 1997                                    | N/A          |
| <i>abi5-7</i>                         | Nambara et al., 2002                                          | N/A          |
| <i>arf10/16</i>                       | Wang et al., 2005                                             | N/A          |
| <i>35S:R4/PYL10 #1</i>                | This study                                                    | N/A          |
| <i>35S:R4/PYL10 #2</i>                | This study                                                    | N/A          |
| <i>35S:R12/PYL1</i>                   | Yang et al., 2016                                             | N/A          |
| <i>35S:ABI1</i>                       | Wang et al., 2018                                             | N/A          |
| <i>35S:ABI2</i>                       | Wang et al., 2018                                             | N/A          |
| <i>35S:ABI3</i>                       | This study                                                    | N/A          |
| <i>35S:ABI4</i>                       | Shu et al., 2013                                              | N/A          |
| <i>35S:ABI5</i>                       | Brocard et al., 2002                                          | N/A          |
| <i>LEC1:LEC1-GFP</i>                  | Li et al., 2014                                               | N/A          |
| <i>ABI3:GUS</i>                       | Ryu et al., 2014                                              | N/A          |
| <i>ABI4:GUS</i>                       | Söderman et al., 2000                                         | N/A          |
| <i>BBM:BBM-GFP-GUS</i>                | This study                                                    | N/A          |

N/A, not applicable

**Supplementary Table S2.** Primers used in this study.

|                           |    |                                                                    |
|---------------------------|----|--------------------------------------------------------------------|
| <b>Cloning</b>            |    |                                                                    |
| <i>PYL10</i>              | Fw | GGGGACAAGTTTGTACAAAAAGCAGGCTCGATGAACGGTGACGAAACAAAG                |
|                           | Rv | GGGGACCACTTTGTACAAGAAAGCTGGGTCTCATATCTTCTCTCCATAGATTC              |
| <i>ABI3</i>               | Fw | TGTTTCATTTCCACTTCAACG                                              |
|                           | Rv | GTTTCTTTTGTCTCTGTTTTTCATT                                          |
| <i>BBM</i>                | Fw | GGGGACAAGTTTGTACAAAAAGCAGGCTCAGAAAGCTTACGATTACAGAGACCA             |
|                           | Rv | GGGGACCACTTTGTACAAGAAAGCTGGGTGAAGTGTGTTCCAAACTGAAAACG              |
| <i>OLE1:OLE1-RFP</i>      | Fw | AGTCTCTAGAACTAAATGGAGCAACCTACTGTTTTG                               |
|                           | Rv | AGTCACTAGTAATGTCGCGGAACAAATTTTAAAAC                                |
| <b>CRISPR-Cas9</b>        |    |                                                                    |
| <i>gRNA 1</i>             | Fw | TGTGGTCTCAATTG <b>CGGTGACGAAACAAAGAAGG</b> GTTTTAGAGCTAGAAATAGCAAG |
| <i>gRNA 2</i>             | Fw | TGTGGTCTCAATT <b>GCAAAGCTTACGAGATGCAG</b> GTTTTAGAGCTAGAAATAGCAAG  |
| <i>gRNA 3</i>             | Fw | TGTGGTCTCAATTG <b>AAAAGGTGTGGTCAATTGTG</b> GTTTTAGAGCTAGAAATAGCAAG |
| <i>gRNA 4</i>             | Fw | TGTGGTCTCAATT <b>GGTACAAGGTAAGAAGCTGG</b> GTTTTAGAGCTAGAAATAGCAAG  |
| CRISPR Universal          | Rv | TGTGGTCTCAAGCGTAATGCCAACTTTGTAC                                    |
| <b>Genotyping</b>         |    |                                                                    |
| <i>pyl8-1</i>             | LP | AGAGAGTGAACCCCATGATC                                               |
|                           | RP | TTCTTCTTCTCCTTCATGCG                                               |
| <i>pyl9</i>               | LP | TTCATTCAATGCCCTGTTC                                                |
|                           | RP | TAGGTCCCCAAAACGTCATAC                                              |
| <i>pyl10<sup>CR</sup></i> | Fw | TCCTTTAAATAGCTGCACACTGGT                                           |
|                           | Rv | TCATATCTTCTTCTCCATAGATTC                                           |
| <i>hab1-1</i>             | LP | ACAATGGCTTGTAGGTTGCTG                                              |
|                           | RP | CGAAAACTCGAAACTTACCCC                                              |
| <i>ahg3</i>               | LP | GTAATCACGGAACGGATTAC                                               |
|                           | LP | CGGTTCACTCTCTCCAACAAC                                              |
| <i>LBb1.3</i>             | BP | ATTTTGCCGATTTCGGAAC                                                |
| <b>qRT-PCR</b>            |    |                                                                    |
| <i>SAND</i>               | Fw | AACTCTATGCAGCATTGATCCACT                                           |
|                           | Rv | TGATTGCATATCTTTATCGCCATC                                           |
| <i>TIP41</i>              | Fw | CACCATGGACCAGTATGAAAAAGTTGAAAAG                                    |
|                           | Rv | TCATGGTACGAACCCAATGTCC                                             |
| <i>YUC8</i>               | Fw | TGCGGTTGGGTTTACGAGGAAAAG                                           |
|                           | Rv | GCGATCTTAACCGCGTCCATTG                                             |
| <i>IAA34</i>              | Fw | GTTTGGTGGTAGGTCGCAAG                                               |
|                           | Rv | ATCCCCAGCATTCTCCACA                                                |
| <i>ABI3</i>               | Fw | GGCAGGGATGGAACACAGAAAAGA                                           |
|                           | Rv | GGCAAAACGATCCTTCCGAGGTTA                                           |
| <i>ABI4</i>               | Fw | GGGCAGGAACAAGGAGGAAGTG                                             |
|                           | Rv | ACGGCGGTGGATGAGTTATTGAT                                            |
| <i>ABI5</i>               | Fw | CAGCTGCAGGTTACATTCTG                                               |
|                           | Rv | CACCTCGCCTCCATTGTTAT                                               |
| <i>RAB18</i>              | Fw | TCGGTCGTGTATTGTGCTTTTT                                             |
|                           | Rv | CCAGATGCTCATTACACACTCATG                                           |
| <i>ABI1</i>               | Fw | TGAGATGGCAAGGAAGCGGATTCT                                           |
|                           | Rv | GGCTTCAAATCAACCACCACCACA                                           |
| <i>ABI2</i>               | Fw | ACACGTGGCAAGAGAAAGTGGAAGA                                          |
|                           | Rv | CCGCAATTCGCGACAAAGATGTGA                                           |
| <i>LEA</i>                | Fw | CGGCCATGCAACTAACAAGAACC                                            |
|                           | Rv | GAGACTTTCGGGAAGAAGCAGC                                             |
| <i>OLEO2</i>              | Fw | GCCGAGGTCAAGGTCAGTATGAAGG                                          |
|                           | Rv | GGGTACTAGATGGGCCACTTTCAGG                                          |

|              |    |                        |
|--------------|----|------------------------|
| <i>RD29B</i> | Fw | GGCGGGCAAAGCGAG        |
|              | Rv | TGCCCGTAAGCAGTAACAGATC |

Note: Forward primers for cloning gRNAs are shown with the target sequence in red.

Fw, Forward primer; Rv, Reverse primer. LP, Left genomic primer; RP, Right genomic primer; BP, T-DNA border primer.
